# Supplementary material
Source: PubMed Central journal article supplement (PMC3128485)

**Table S1. Total Splenic T Cell Subsets at Different Times after HSCT**

|            |               | Number of Cells (x 10 <sup>5</sup> ) |                 |              |                 |
|------------|---------------|--------------------------------------|-----------------|--------------|-----------------|
| Day after  |               | Treatment Group <sup>a</sup>         |                 |              |                 |
| Transplant | T Cell Subset | Unmanipulated T                      | CD25-depleted T | BM Only      | Normal Controls |
| 5          | CD8           | 5.0 ± 1.1                            | 6.4 ± 1.8       | 0.4 ± 0.3 ‡‡ | 60.0 ± 6.1      |
|            | CD4           | 20.6 ± 8.5                           | 17.0 ± 8.5      | 4.0 ± 0.2 ‡‡ | 130.1 ± 16.0    |
|            | Treg          | 2.5 ± 0.8                            | 1.4 ± 0.6 †     | 0.5 ± 0.2 ‡‡ | 13.3 ± 2.1      |
| 8          | CD8           | 4.4 ± 1.4                            | 5.8 ± 2.6       | 0.3 ± 0.1 ‡‡ |                 |
|            | CD4           | 18.0 ± 5.0                           | 17.7 ± 3.7      | 5.9 ± 3.6 ‡‡ |                 |
|            | Treg          | 4.0 ± 0.8                            | 2.5 ± 0.6 †     | 0.5 ± 0.2 ‡‡ |                 |
| 11         | CD8           | 12.7 ± 6                             | 16.8 ± 5.4      | 1.0 ± 0.1 ‡‡ |                 |
|            | CD4           | 25.1 ± 4.6                           | 24.3 ± 1.5      | 2.0 ± 0.1 ‡‡ |                 |
|            | Treg          | 7.4 ± 1.7                            | 5.4 ± 0.8 †     | 0.7 ± 0.1 ‡‡ |                 |
| 18         | CD8           | 15.5 ± 4.1                           | 28.0 ± 10.0     | 1.6 ± 0.1 ‡‡ |                 |
|            | CD4           | 25.5 ± 6.8                           | 32.0 ± 7.6      | 5.4 ± 0.3 ‡‡ |                 |
|            | Treg          | 8.5 ± 2.3                            | 8.5 ± 0.9       | 2.2 ± 0.2 ‡‡ |                 |

<sup>a</sup> A/J mice were transplanted with 5x10<sup>7</sup> syngeneic BM cells plus 3x10<sup>6</sup> unmanipulated T cells or CD25-depleted T cells. Some mice were transplanted with BM cells only, and normal non-transplanted mice were included as a control group. Spleens were collected at different times after HSCT. The data for each group represents the mean absolute numbers of CD8, CD4 and Treg (CD4<sup>+</sup>CD25<sup>+</sup>Foxp3<sup>+</sup>) cells ± SEM. 6-10 mice were analyzed for each group (combined from 2-3 independent experiments).

† p<0.05 for comparisons between Unmanipulated T and CD25-depleted T.

‡‡ p<0.01 for comparisons between Unmanipulated T and BMT only.

**Table S2. Percentages of CD4 T Cells after HSCT**

| Day after<br>Transplant | Percentages of CD4 Cells     |                             |                 |                |
|-------------------------|------------------------------|-----------------------------|-----------------|----------------|
|                         | Treatment Group <sup>a</sup> |                             |                 |                |
|                         | Unmanipulated T              | <i>In vivo</i> CD4-depleted | CD25-depleted T | CD4-depleted T |
| 11                      | 5.0 ± 1.1                    | 0.01 ± 0.002 ††             | 4.6 ± 0.1       | 1.0 ± 0.3 ‡‡   |
| 18                      | 5.3 ± 1.6                    | 0.31 ± 0.02 ††              | 4.9 ± 0.8       | 1.7 ± 0.2 ‡    |
| 25                      | 7.6 ± 0.9                    | 3.1 ± 0.5 ††                | 7.3 ± 1.0       | 6.2 ± 0.8      |
| 50                      | 11.4 ± 0.7                   | 6.5 ± 1.0 †                 | 10.8 ± 1.2      | 9.7 ± 1.0      |

<sup>a</sup> A/J mice were transplanted with BM cells plus T cells presensitized to tumor antigens that were either unmanipulated (Unmanipulated T), depleted of CD25<sup>+</sup> cells (CD25-depleted T), or CD4<sup>+</sup> cells (CD4-depleted T) cells *ex vivo* using immunomagnetic sorting. Some mice given unmanipulated T cells and treated with *in vivo*-depleting anti-CD4 mAb (250 mg intraperitoneally) on days -1, 2, 5, and 8 after transplantation (*In vivo* CD4-depleted). Spleens were collected at the indicated times after transplant and the percentages of CD4 T cells were assessed. The data for each group represents the mean percentage ± SEM from 6 total mice (combined from two independent experiments).

† p<0.05; †† p<0.01 for comparisons between Unmanipulated T and *In vivo* CD4-depleted groups.

‡ p<0.05; ‡‡ p<0.01 for comparisons between Unmanipulated T and CD4-depleted T groups.

Figure S1. Tumor-bearing recipients given HSC grafts consisting of  $5 \times 10^6$  bone marrow cells plus  $2 \times 10^6$  of unmanipulated or CD25-depleted T cells from tumor-bearing **nonvaccinated** donors (A) or plus  $0.67 \times 10^6$  unmanipulated T cells or CD25-depleted T cells, from tumor-bearing **vaccinated (presensitized)** donors (B). The recipients were vaccinated as in Figure 1. Tumor burdens were monitored by bioluminescent imaging at days 1 and 14 after transplantation. The results are depicted as photon flux per minute and imaging data was compared using the Student's *t*-test.

Figure S2. Tumor-bearing recipients given HSC grafts consisting of bone marrow cells plus  $2 \times 10^6$  unmanipulated T cells, CD25-depleted T cells, or T cells plus added CD25<sup>+</sup> cells (at a 1:2 CD25<sup>+</sup> cell-to-T cell ratio; CD25-supplemented) from tumor-bearing **nonvaccinated** donors or plus  $0.67 \times 10^6$  unmanipulated T cells, CD25-depleted T cells, or T cells plus added CD25<sup>+</sup> cells (at a 1:2 CD25<sup>+</sup> cell-to-T cell ratio; CD25-supplemented) from tumor-bearing **vaccinated (presensitized)** donors. The recipients were vaccinated as in Figure 1. Tumor burdens in mice from panels were monitored by bioluminescent imaging at days 1 and 14 after transplantation. The results are depicted as photon flux per minute and imaging data was compared using the Student's *t*-test. The data represents the combined results of 2 independent experiments with a combined 11-12 mice per group.



Figure S2

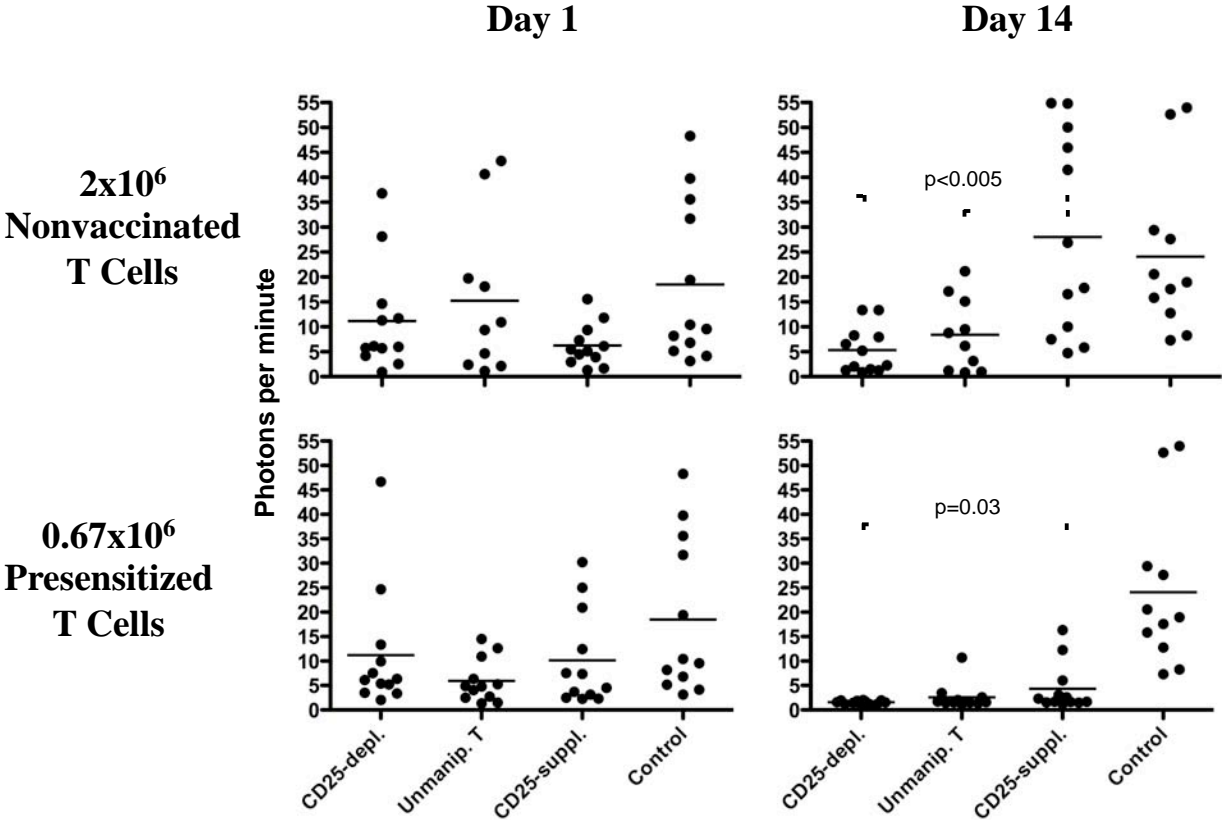

Supplement: supp_blood-2010-12-326108_blood-2010-12-326108-1.pdf [file supp_blood-2010-12-326108_blood-2010-12-326108-1.pdf]
